# Supplementary figures and images for: Bt-Modified Transgenic Rice May Shift the Composition and Diversity of Rhizosphere Microbiota
Source: MDPI journal article supplement (doi:10.3390/plants13101300), 2024-05-08

Species: [1.5% of variance;  $P < \text{NULL}$ ; 95% CI = 1%, 2%]

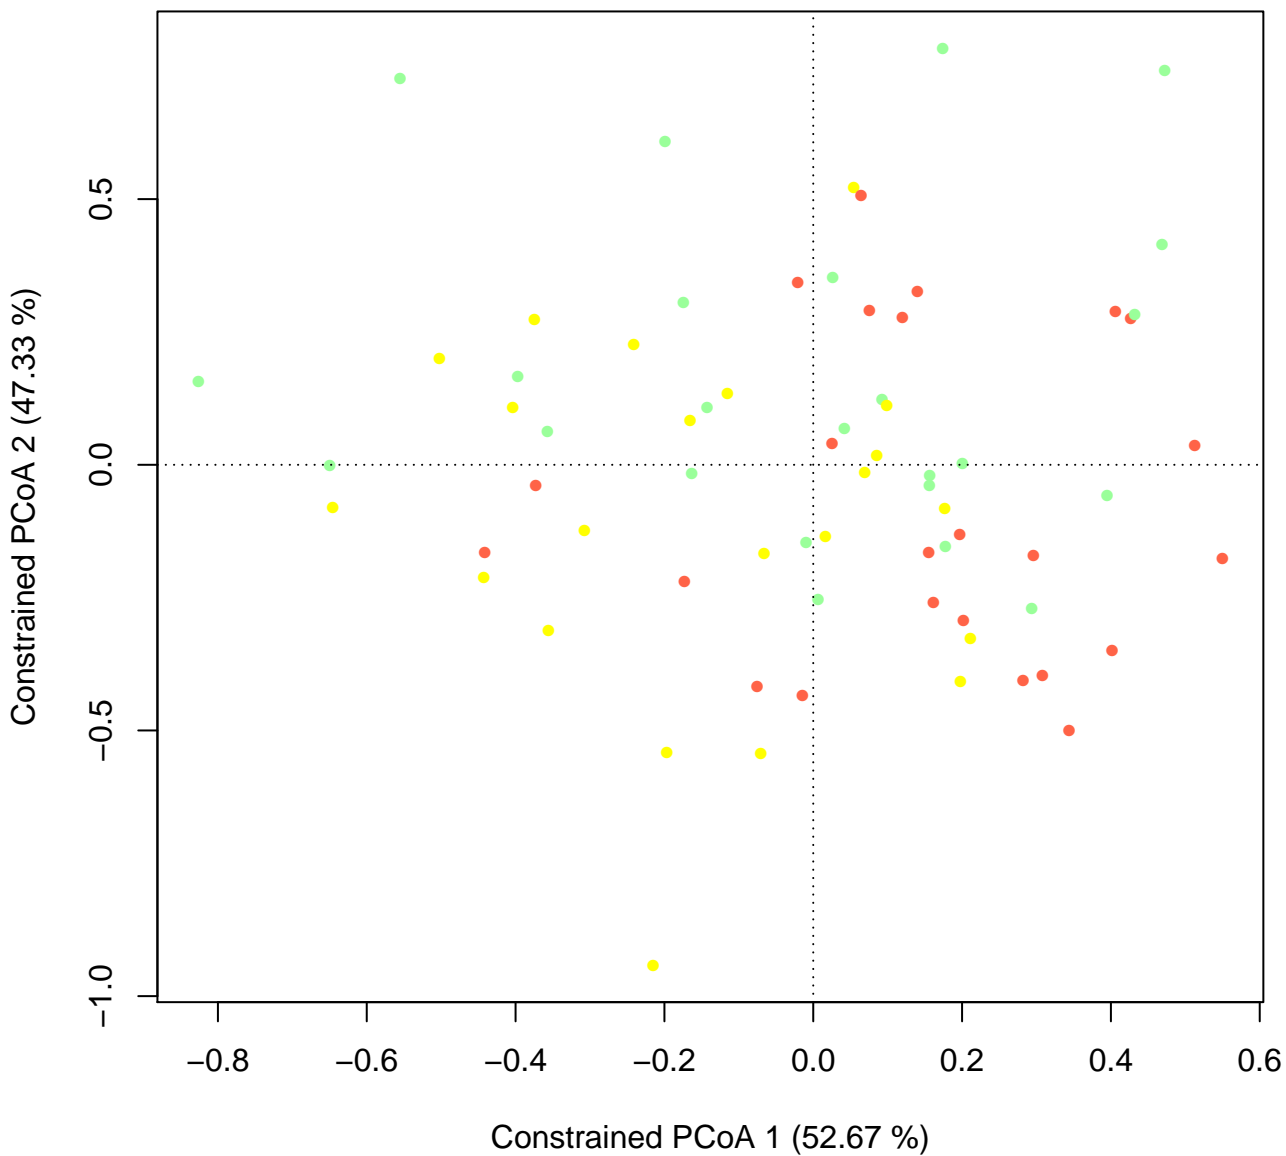

Supplement: s1 [file s1]

Species: [1.5% of variance;  $P < \text{NULL}$ ; 95% CI = 1%, 2%]



Supplement: s1 [file s1]

Repetition: [1.5% of variance;  $P < \text{NULL}$ ; 95% CI = 1%, 2%]

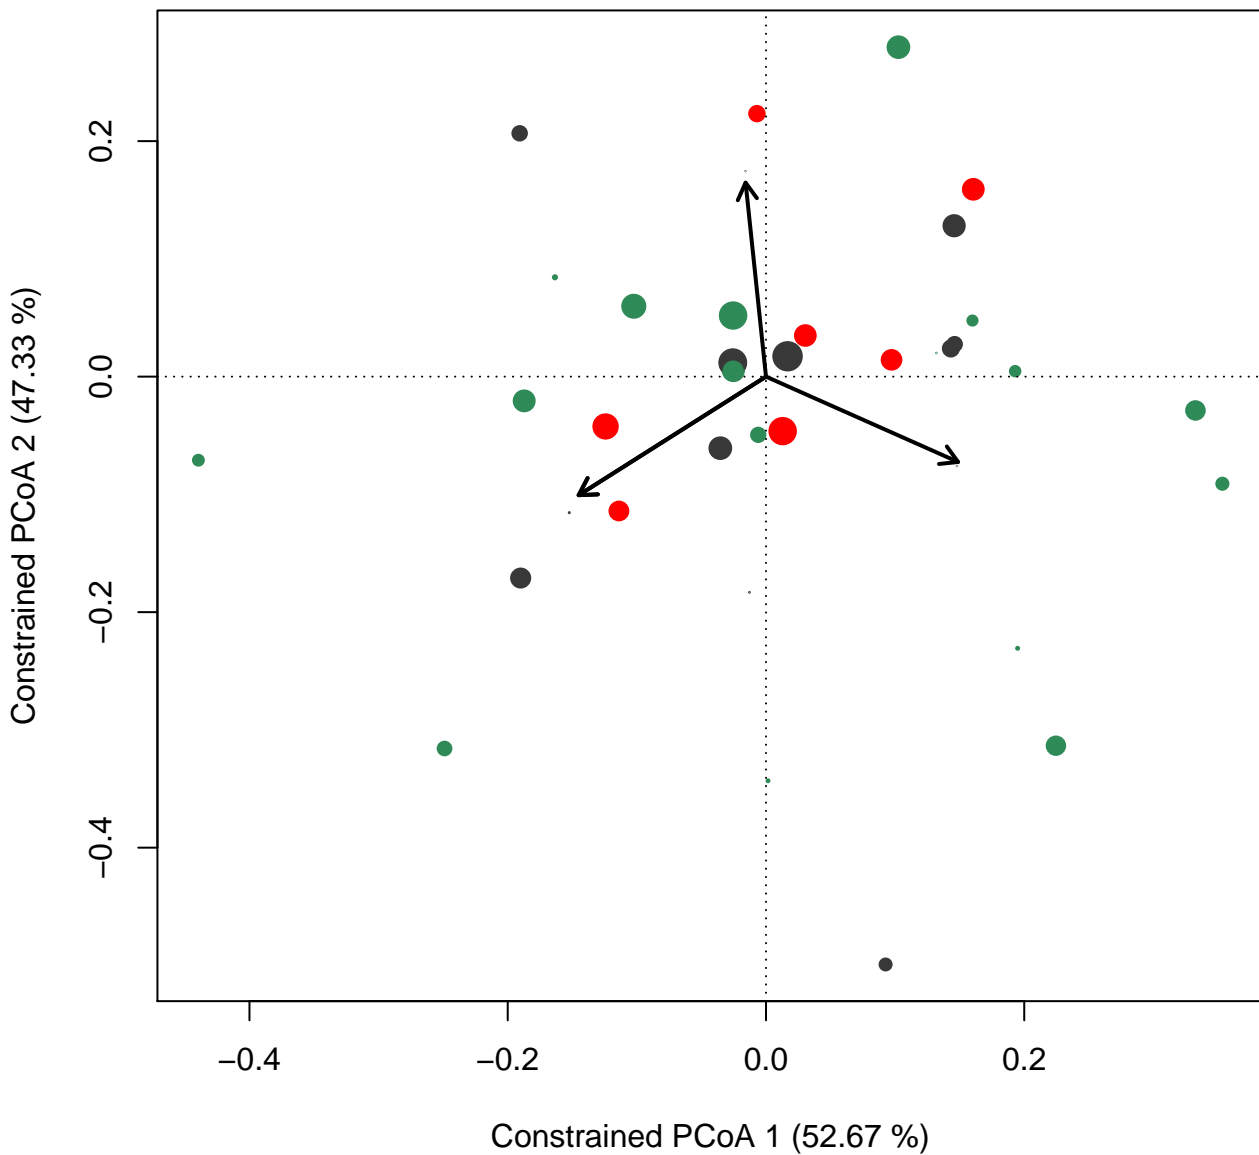

Supplement: s1 [file s1]
